# Supplementary material for: Highly compressible zinc-ion batteries with stable performance
Source: Royal Society of Chemistry journal article supplement (doi:10.1039/c9ta02990g), 2019-01-01
Supplement: c9ta02990g1.pdf [file c9ta02990g1.pdf]

## Electronic Supplementary Information

### Highly Compressible Zinc-Ion Batteries with Stable Performance

Hongmei Cao,<sup>a</sup> Fang Wan,<sup>a</sup> Linlin Zhang,<sup>a</sup> Xi Dai,<sup>a</sup> Shuo Huang,<sup>a</sup> Lili Liu<sup>\*b</sup> and Zhiqiang Niu<sup>\*a</sup>

<sup>a</sup> Key Laboratory of Advanced Energy Materials Chemistry (Ministry of Education), Renewable Energy Conversion and Storage Center, College of Chemistry, Nankai University, Tianjin, 300071, P. R. China.

E-mail: zqniu@nankai.edu.cn (Z. Niu)

<sup>b</sup> Tianjin Key Laboratory for Photoelectric Materials and Devices, School of Materials Science and Engineering, Tianjin University of Technology, Tianjin 300384, P. R. China.

E-mail: lililiuhappy@163.com (L. Liu)

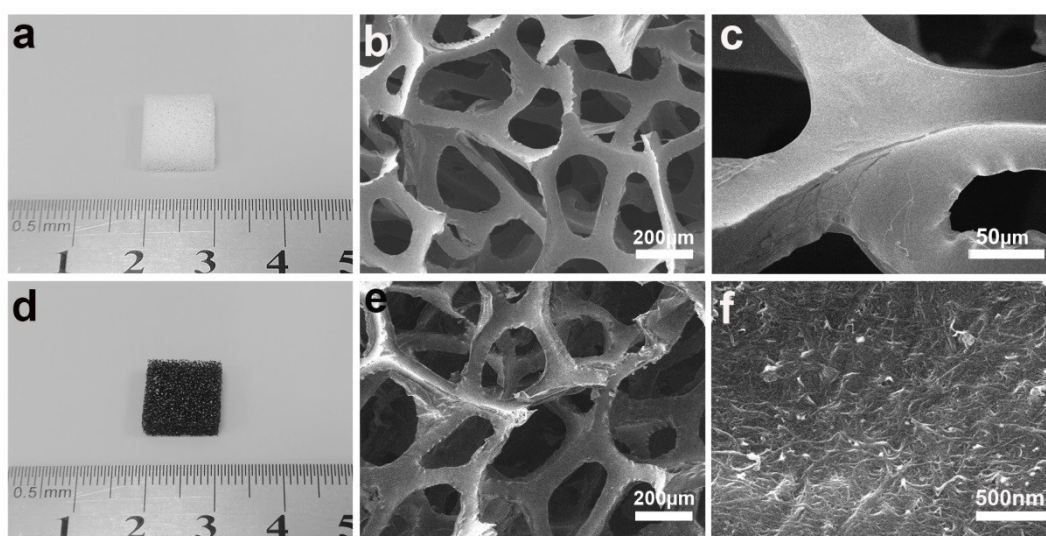

Fig. S1 (a) Optical image, (b) SEM image and (c) high magnification SEM image of sponge. (d) Optical image, (e) SEM image and (f) high magnification SEM image of SWCNT-sponge.

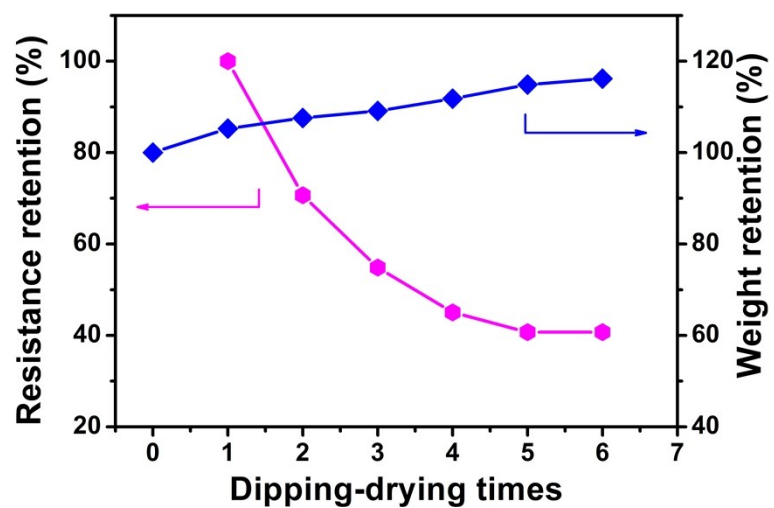

Fig. S2 The relationship between the times of dipping and drying process and the mass loading of SWCNTs and resistance of SWCNT-sponge, respectively.

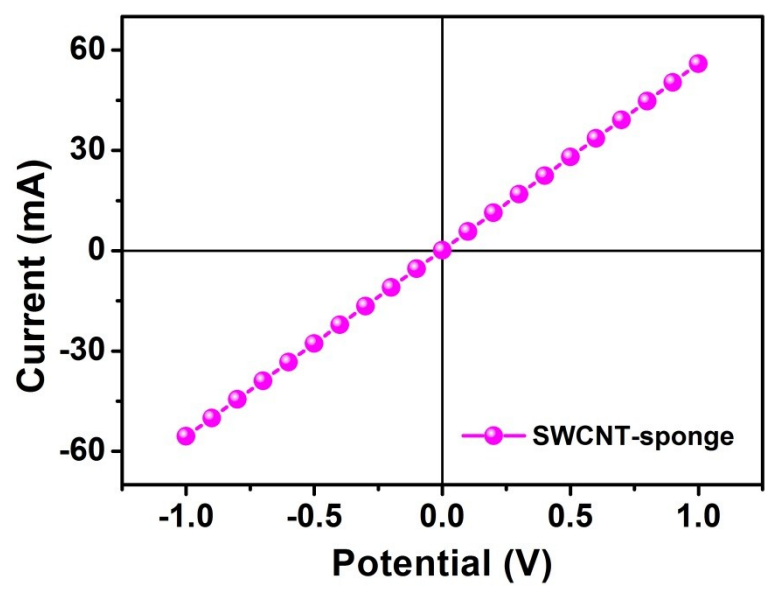

Fig. S3 I-V curve of SWCNT-sponge.

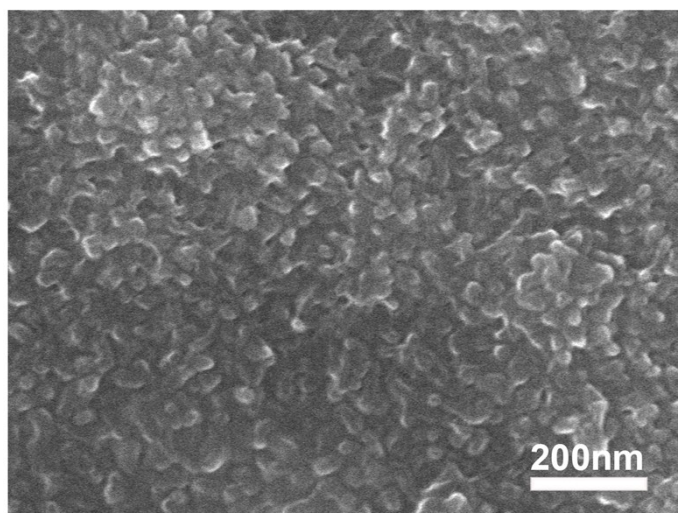

Fig. S4 The SEM image of PANI being deposited on the surface of SWCNT-sponge by polymerization for 30 min.

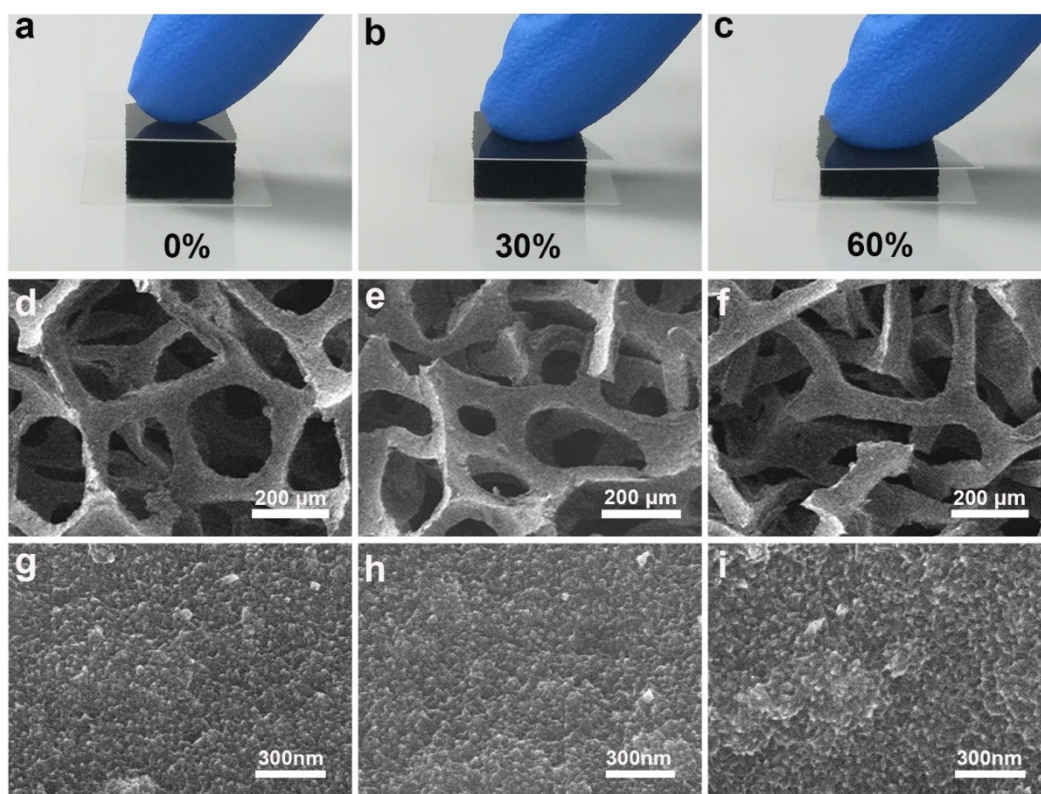

Fig. S5 (a-c) Optical images, (d-f) the corresponding SEM images and (g-i) high magnification SEM images of PANI-SWCNT-sponge (obtained by polymerization for 30 min) at different strains of 0%, 30%, and 60%.

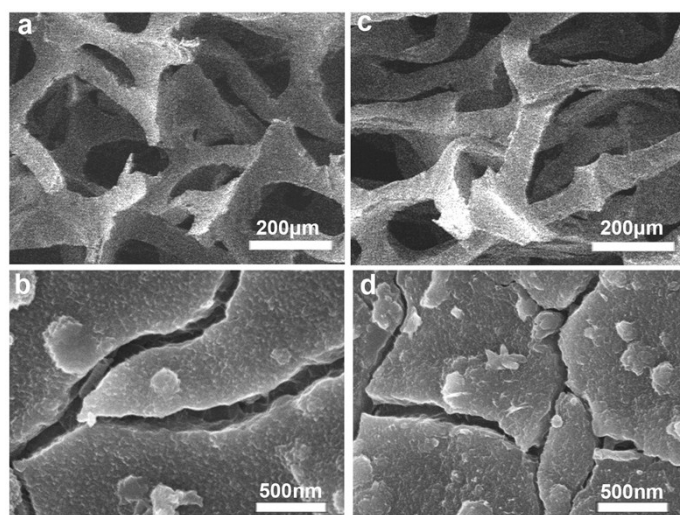

Fig. S6 (a) SEM image and (b) high magnification SEM image of PANI-SWCNT-sponge (obtained by polymerization for 45 min) at a compressive strain of 60%. (c) SEM image and (d) high magnification SEM image of PANI-SWCNT-sponge (obtained by polymerization for 60 min) at a compressive strain of 60%.

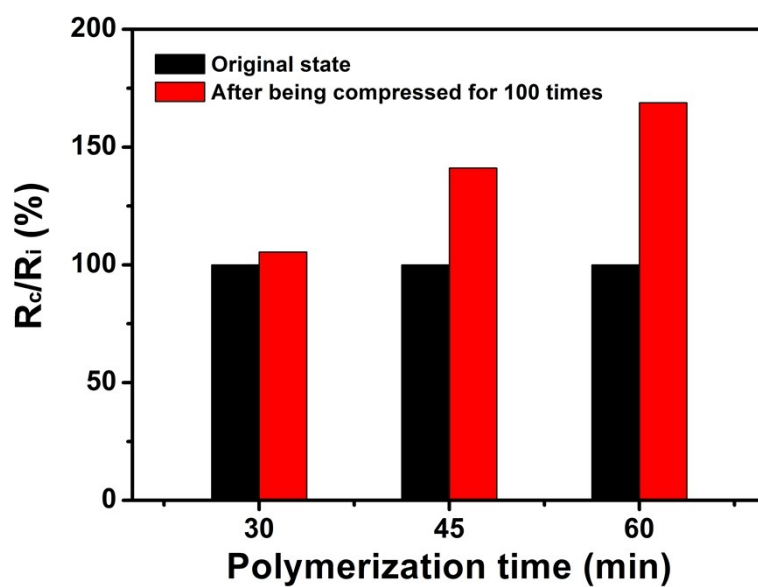

Fig. S7 The changes of electrical resistance of the PANI-SWCNT-sponge after being compressed ( $R_i$ : resistance before being compressed;  $R_c$ : resistance after being compressed).

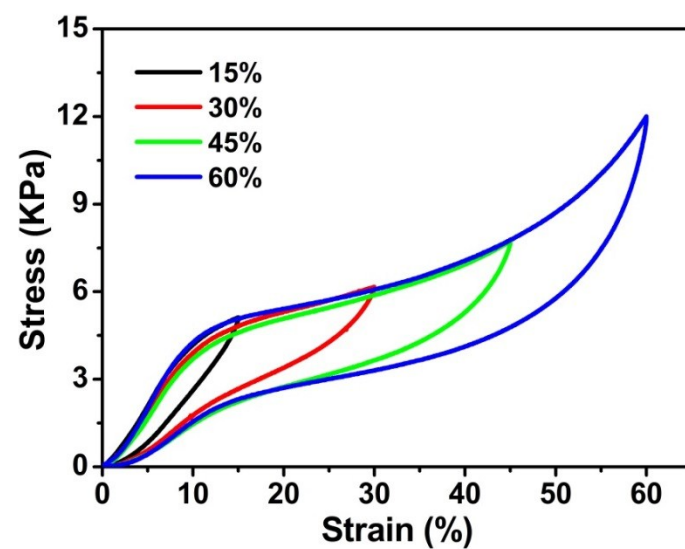

Fig. S8 Stress–strain curves of PANI-SWCNT-sponge at different strains of 15%, 30%, 45%, and 60%.

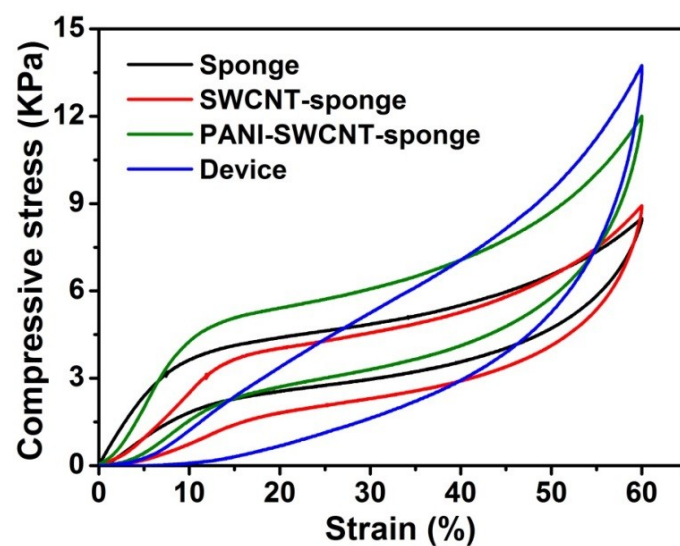

Fig. S9 Stress-strain curves of sponge, SWCNT-sponge, PANI-SWCNT-sponge, and compressible ZIBs with a maximum strain of 60%.

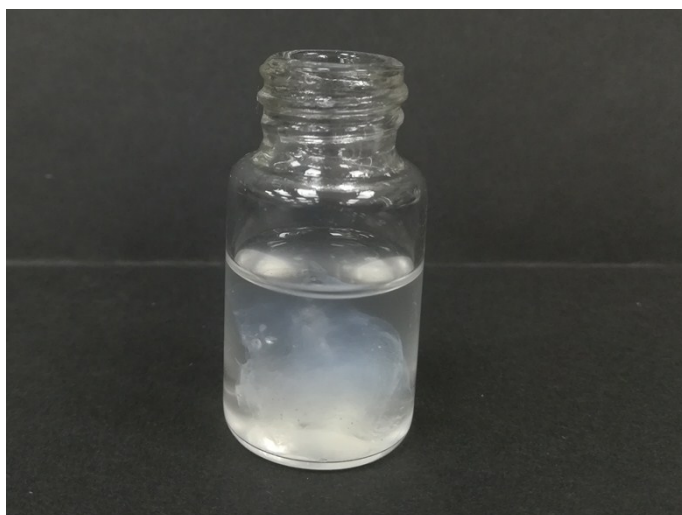

Fig. S10 The optical images of the mixture of PVA and 1 M  $\text{ZnSO}_4$  aqueous solution.

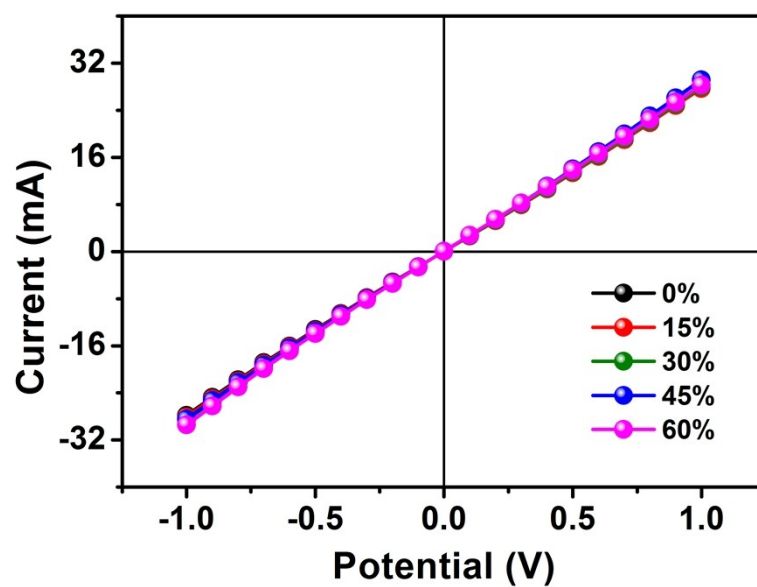

Fig. S11 I-V curves of PANI-SWCNT-sponge in quasi-solid-state PVA/Zn(CF<sub>3</sub>SO<sub>3</sub>)<sub>2</sub> electrolyte under different strains of 15%, 30%, 45%, and 60%.

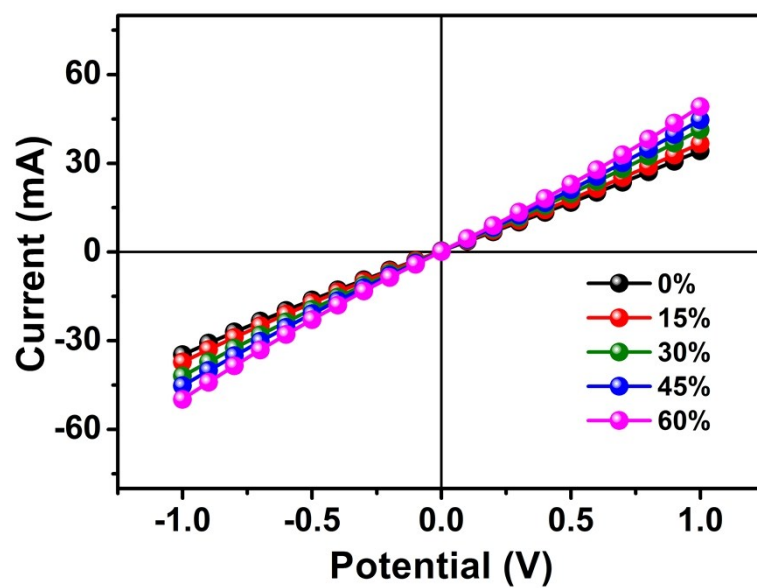

Fig. S12 I-V curves of PANI-SWCNT-sponge in liquid  $\text{Zn}(\text{CF}_3\text{SO}_3)_2$  electrolyte under different strains of 15%, 30%, 45%, and 60%.

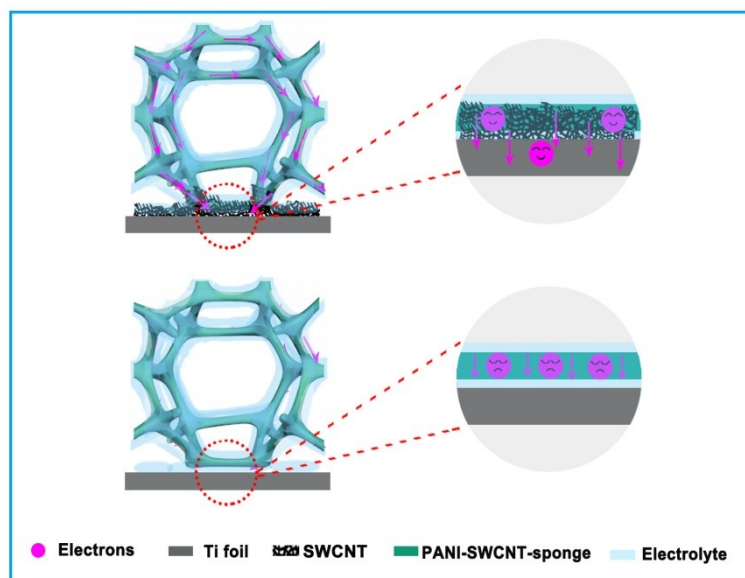

Fig. S13 The schematic illustration of electron transport between the PANI-SWCNT-sponge and Ti foil.

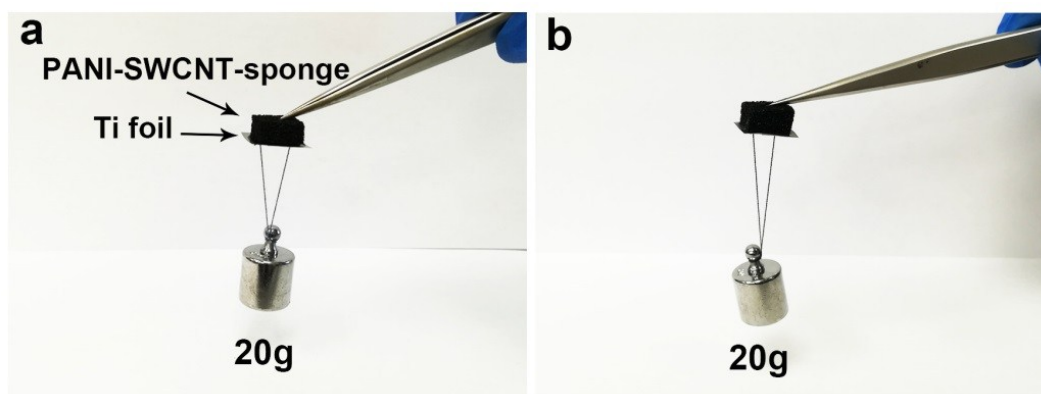

Fig. S14 Optical images of the load-bearing of PANI-SWCNT-sponge electrode: (a) without electrolyte; (b) with PVA/ $\text{Zn}(\text{CF}_3\text{SO}_3)_2$  electrolyte.

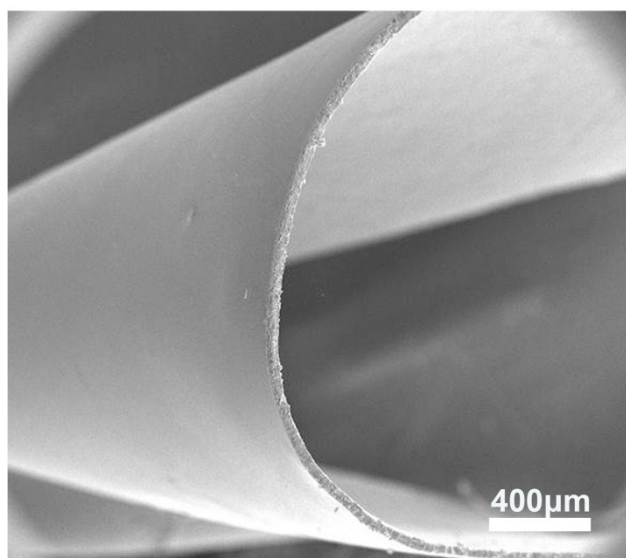

Fig. S15 Cross-sectional SEM image of PVA/Zn(CF<sub>3</sub>SO<sub>3</sub>)<sub>2</sub> electrolyte film.

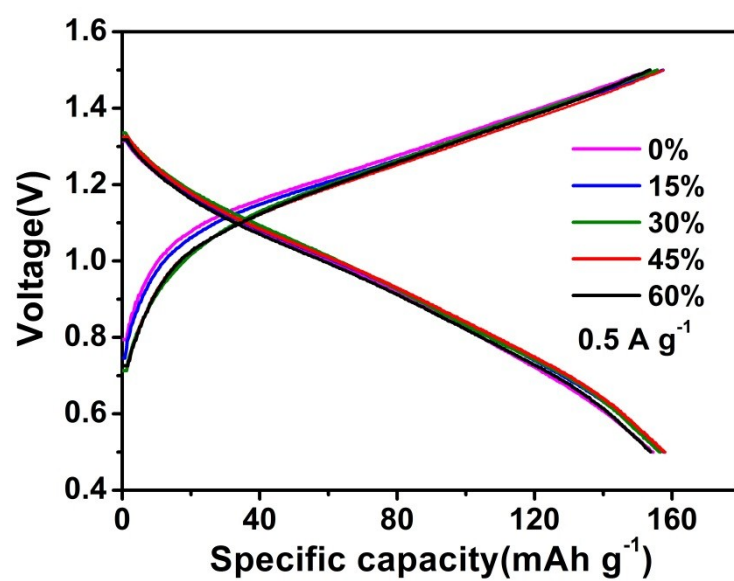

Fig. S16 The charge/discharge curves of the compressible ZIBs at different compressive strains of 0%, 15%, 30%, 45%, and 60%.

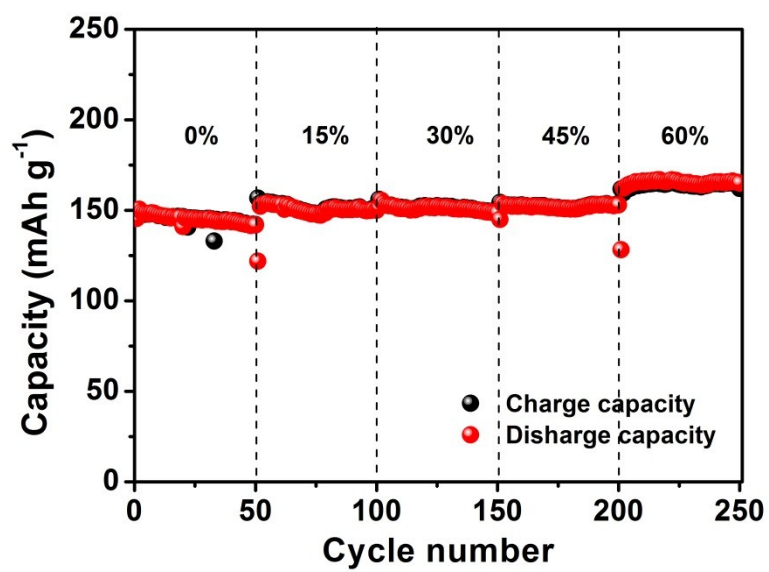

Fig. S17 Cycling performance of the compressible ZIBs based on liquid electrolyte at different compressive strains of 0%, 15%, 30%, 45%, and 60%; current density: 0.5 A g<sup>-1</sup>.

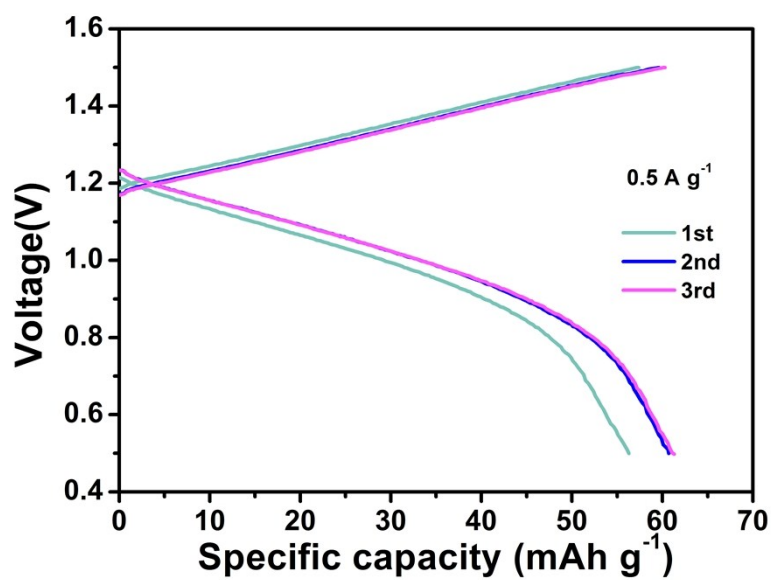

Fig. S18 The charge/discharge curves of the compressible ZIBs at the original state without additional SWCNTs between PANI-SWCNT-sponge and Ti foil.

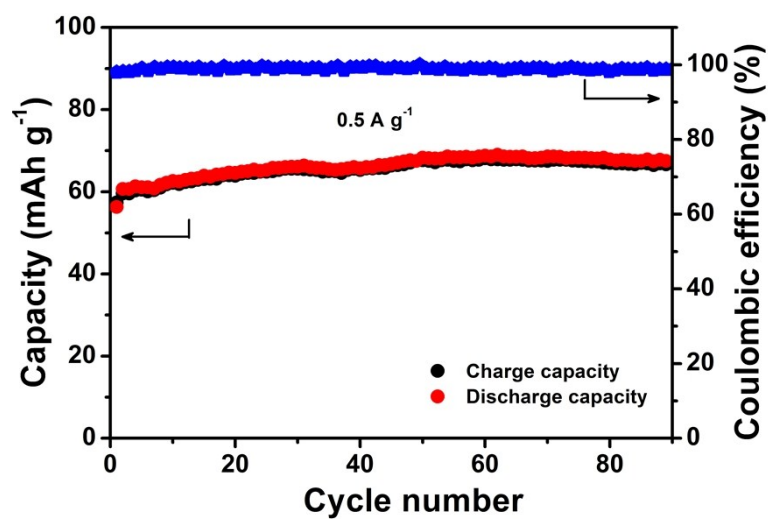

Fig. S19 Cycling performance of the compressible ZIBs at the original state without additional SWCNTs between PANI-SWCNT-sponge and Ti foil.

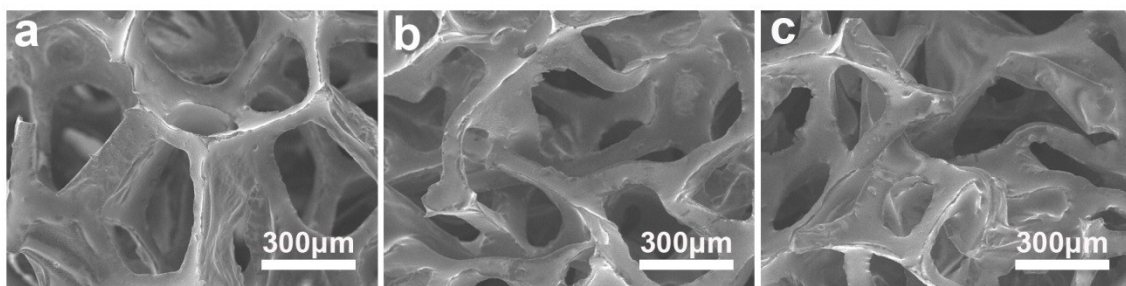

Fig. S20 SEM images of PANI-SWCNT-sponge with PVA/Zn(CF<sub>3</sub>SO<sub>3</sub>)<sub>2</sub> electrolyte at different strains of a) 0%, b) 30%, and c) 60%.

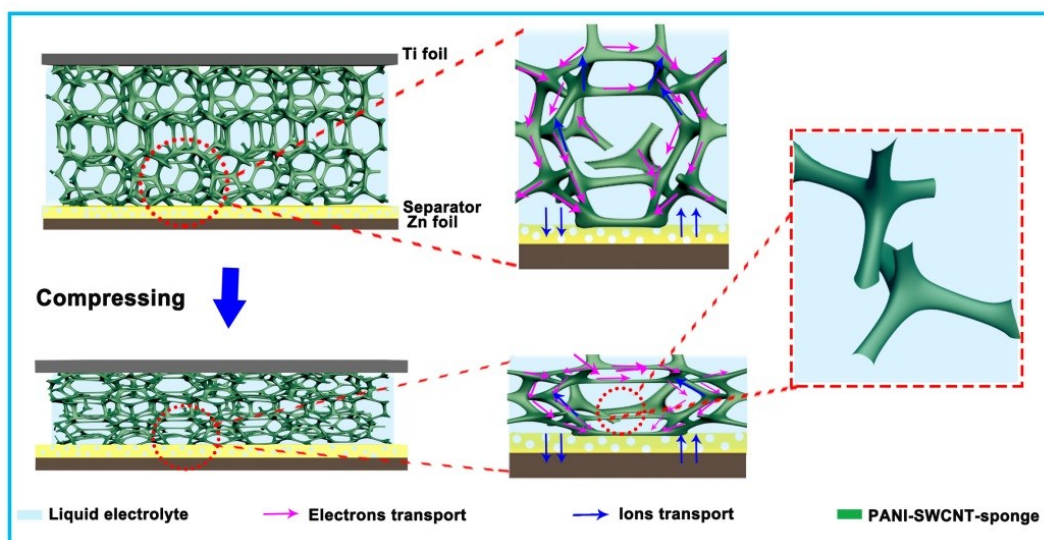

Fig. S21 The schematic illustration of the electron/ion transports in compressible ZIBs at initial and compressing states based on liquid electrolyte.

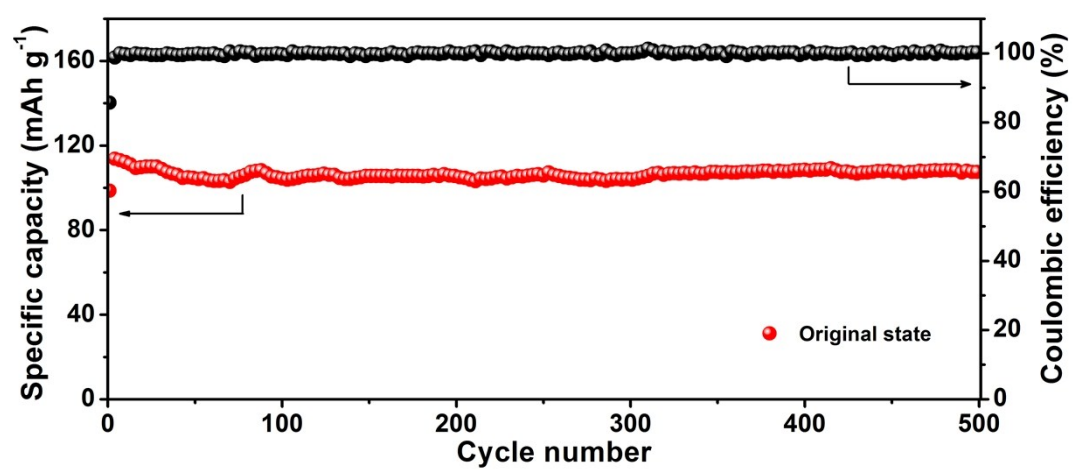

Fig. S22 Long-term cycle life of the devices at the original state at 1.0 A g<sup>-1</sup>.

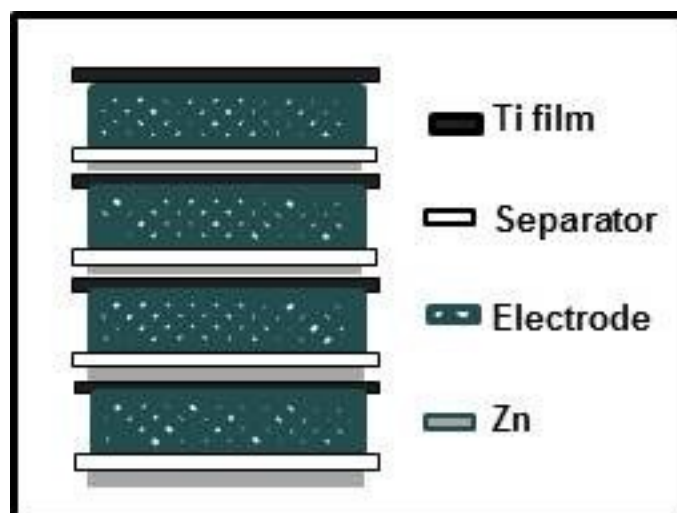

Fig. S23 Schematic diagram of the integrated compressible ZIBs.

Movie S. The compressible ZIBs powering LEDs in a real-time compressing-releasing process.
